# Supplementary material
Source: HighWire-hosted journal article supplement (https://gut.bmj.com/content/70/12/2297)
Supplement: inline-supplementary-material-8 [file inline-supplementary-material-8.pdf]

**Supplementary Table 1. Possible failure conditions and the corresponding solutions**

|          | <b>Failure conditions</b>                                   | <b>Descriptions</b>                   | <b>Solutions</b>                                                                                                                                                                                                                                                                                                                                                                                                                                                                                                                                        |
|----------|-------------------------------------------------------------|---------------------------------------|---------------------------------------------------------------------------------------------------------------------------------------------------------------------------------------------------------------------------------------------------------------------------------------------------------------------------------------------------------------------------------------------------------------------------------------------------------------------------------------------------------------------------------------------------------|
| <b>1</b> | There is almost no liquid in the gut tract while sampling   | Unable to sample                      | The pictures taken by the capsule can be used to monitor the gut tract. Sampling is not carried out until a certain amount of liquid is found                                                                                                                                                                                                                                                                                                                                                                                                           |
| <b>2</b> | There is not enough liquid in the gut tract during sampling | Large amounts of gas may be collected | With the pictures taken by the capsule and an external magnetic control system, operator can adjust the attitude of the capsule making sure that the sampling ports are facing the liquid. Furthermore, with the attitude information obtained by the capsule's accelerate sensor, operator could make sure that the direction of the sampling ports is almost identical with gravitational acceleration, so that the sampling ports are immersed in the liquid. Then, keeping capsule's attitude with external magnetic control system during sampling |
| <b>3</b> | The sampling ports are clogged by food residue              | Unable to sample                      | There is an anti-clogging ring inside the sampling ports, which can filter the chunks of food and other particles                                                                                                                                                                                                                                                                                                                                                                                                                                       |
| <b>4</b> | The sampling ports are clogged by mucosa                    | Unable to sample                      | There are multiple (3) sampling ports along the capsule's cylindrical surface, and the liquid flow rate is so fast after the sampling starts that the probability of all sampling ports being clogged is considerably low                                                                                                                                                                                                                                                                                                                               |
| <b>5</b> | Insufficient vacuum in sampling chamber                     | Insufficient samples collected        | After the capsule is activated, the real time pressure in the sampling chamber is monitored by a pressure sensor.                                                                                                                                                                                                                                                                                                                                                                                                                                       |

|   |                                    |                                                                                                                                                                                                                                                                                                 |                                                                                                                                                            |
|---|------------------------------------|-------------------------------------------------------------------------------------------------------------------------------------------------------------------------------------------------------------------------------------------------------------------------------------------------|------------------------------------------------------------------------------------------------------------------------------------------------------------|
|   |                                    |                                                                                                                                                                                                                                                                                                 | Before the capsule is swallowed, the operator could check the pressure value in the sampling chamber to make sure that the capsule is capable of sampling. |
| 6 | Failure during sampling delay time | There are about 40 seconds between the receiving of sampling instruction and the beginning of sampling, which is called the sampling delay time. During this time, there is no video transmission. Large displacement or attitude change of the capsule may lead to the failure of the sampling | We are upgrading the capsule system now, and the sampling delay time may be reduced to less than 15 seconds.                                               |

---

**Supplementary Table 2. A distance-based coefficient of determination  $R^2$  [unweighted UniFrac and weighted UniFrac] was used to quantify the percentage of microbiota variability in different models (control group and antibiotic group), different regions (jejunum and ileum) and different methods (surgery and MSCE)**

|        | Unweighted Unifrac |       | Weighted Unifrac |       |
|--------|--------------------|-------|------------------|-------|
|        | $R^2$              | p     | $R^2$            | p     |
| Model  | 0.157              | 0.001 | 0.139            | 0.009 |
| Region | 0.147              | 0.001 | 0.079            | 0.085 |
| Method | 0.023              | 0.695 | 0.014            | 0.711 |

**Supplementary Table 3. Evaluation of technical reproducibility. P value between surgery and MSCE for microbiome metrics, including the abundance of four phyla, two alpha-diversity metrics (Chao1 and Shannon index), and three beta-diversity metrics (weighted PCoA1, weighted PCoA2 and weighted PCoA3)**

| t-text<br>Item | Surgery vs. MSCE (p) |        |        |        |
|----------------|----------------------|--------|--------|--------|
|                | Con-J                | Con-I  | Anti-J | Anti-I |
| Actinobacteria | 0.5715               | 0.4149 | 0.1323 | 0.358  |
| Bacteroidetes  | 0.1437               | 0.4016 | 0.1534 | 0.3918 |
| Firmicutes     | 0.1499               | 0.4828 | 0.1466 | 0.3563 |
| Proteobacteria | 0.1645               | 0.6025 | 0.1565 | 0.3579 |
| Chao1          | 0.347                | 0.5282 | 0.3745 | 0.4989 |
| Shannon        | 0.203                | 0.5374 | 0.1707 | 0.3902 |
| Weighted PCoA1 | 0.6013               | 0.4752 | 0.3166 | 0.4257 |
| Weighted PCoA2 | 0.7259               | 0.4844 | 0.443  | 0.4057 |
| Weighted PCoA3 | 0.34                 | 0.4533 | 0.1785 | 0.7928 |
