# Supplementary material
Source: HighWire-hosted journal article supplement (https://gut.bmj.com/content/70/12/2297)

**sFigure 1****A**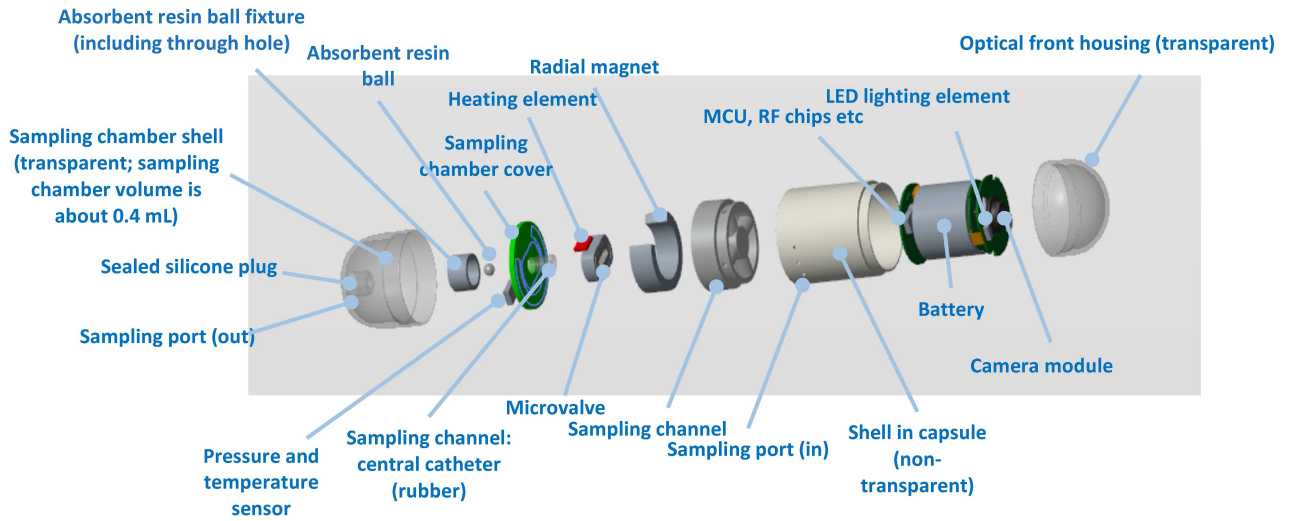**B**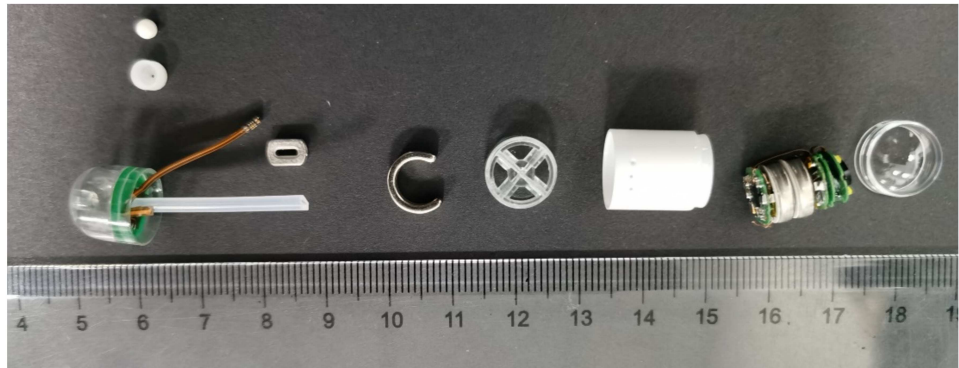**C**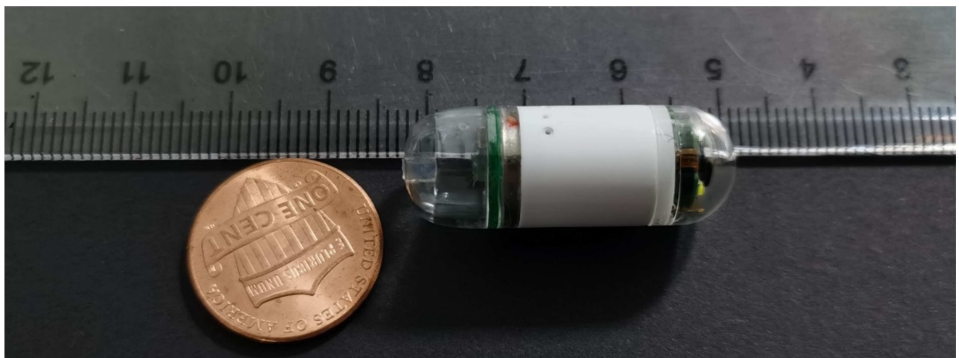

Supplement: inline-supplementary-material-1 [file inline-supplementary-material-1.pdf]

## sFigure 6

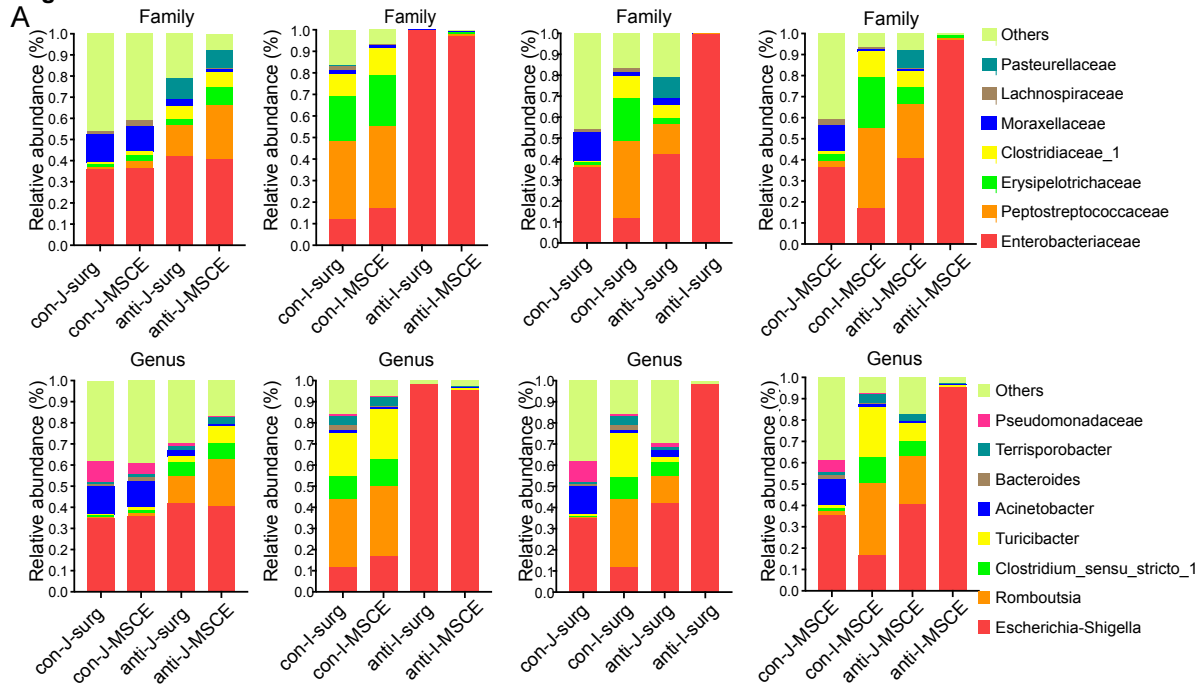**B**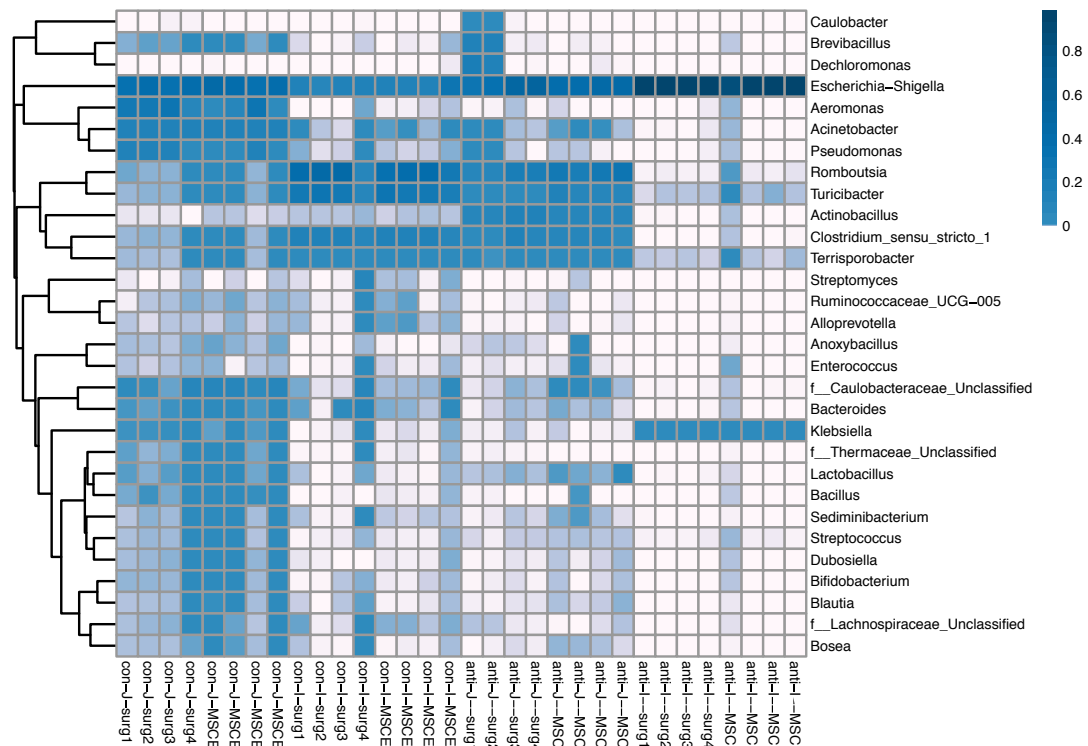

Supplement: inline-supplementary-material-11 [file inline-supplementary-material-11.pdf]

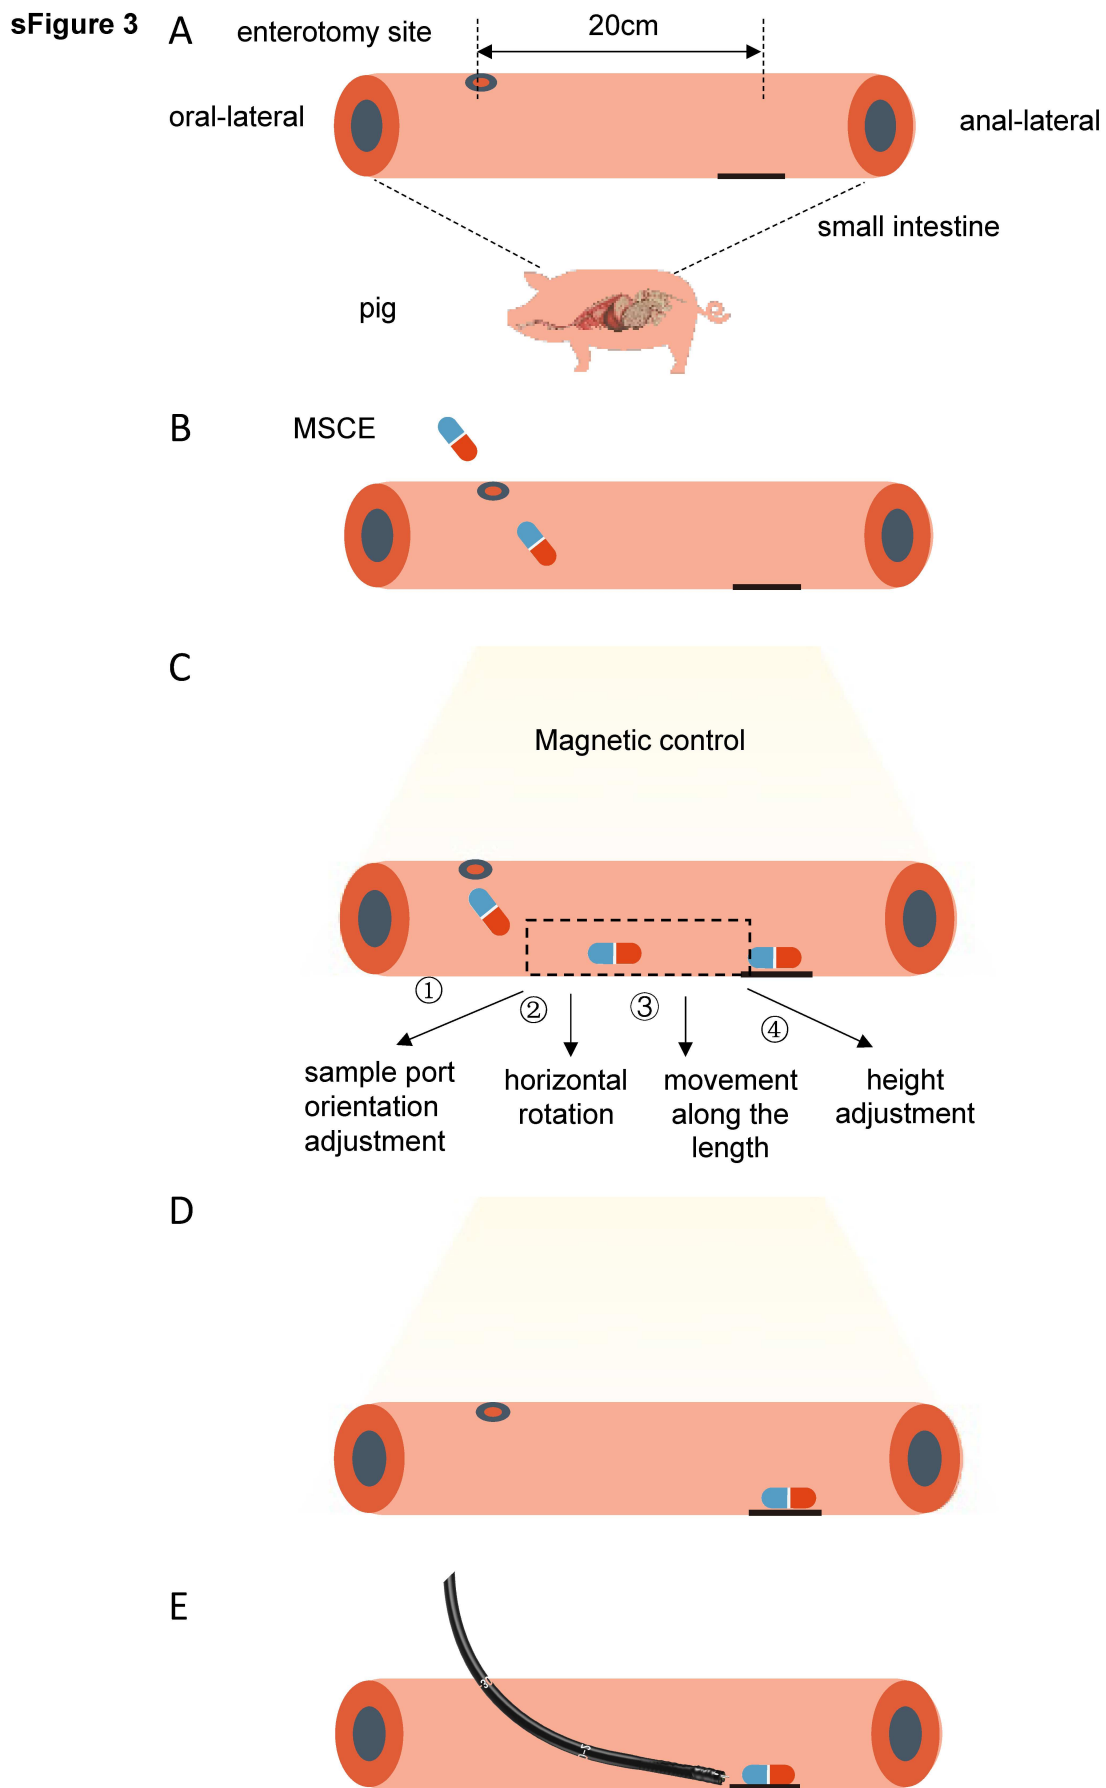

Supplement: inline-supplementary-material-13 [file inline-supplementary-material-13.pdf]

sFigure 4

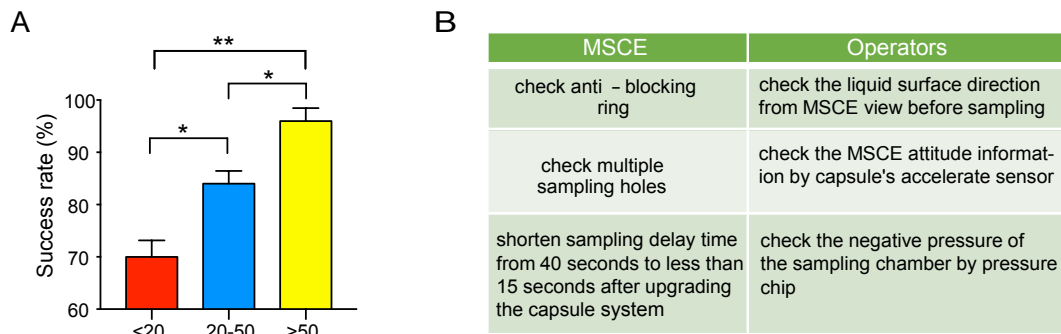

Supplement: inline-supplementary-material-14 [file inline-supplementary-material-14.pdf]

sFigure 5

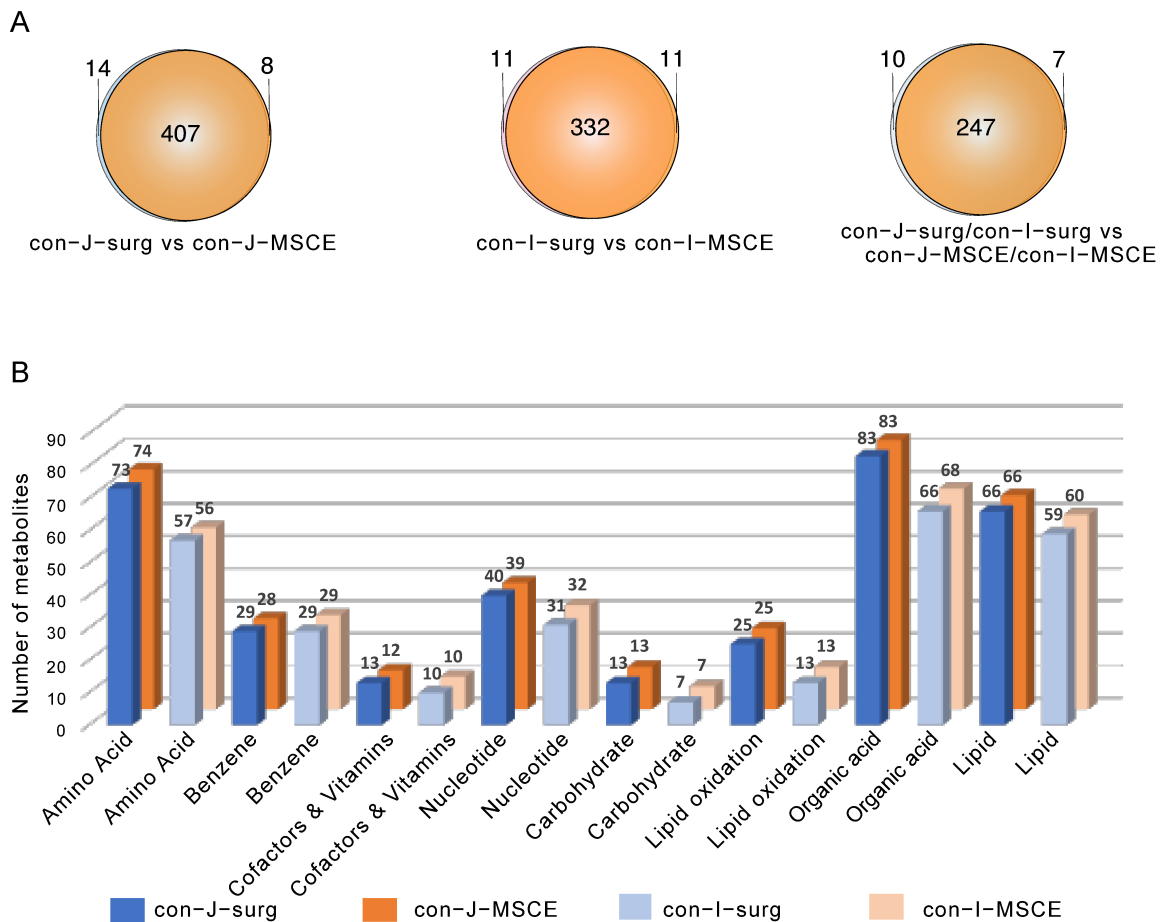

Supplement: inline-supplementary-material-15 [file inline-supplementary-material-15.pdf]

## sFigure 7

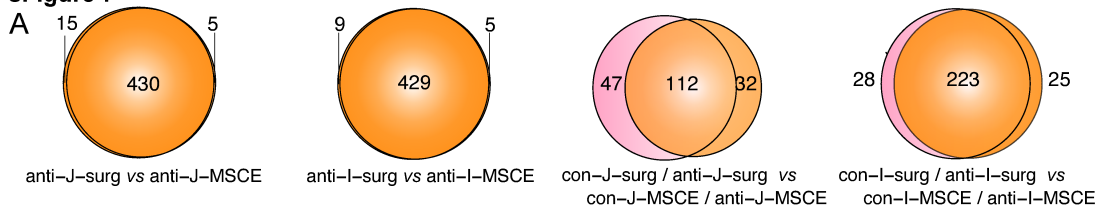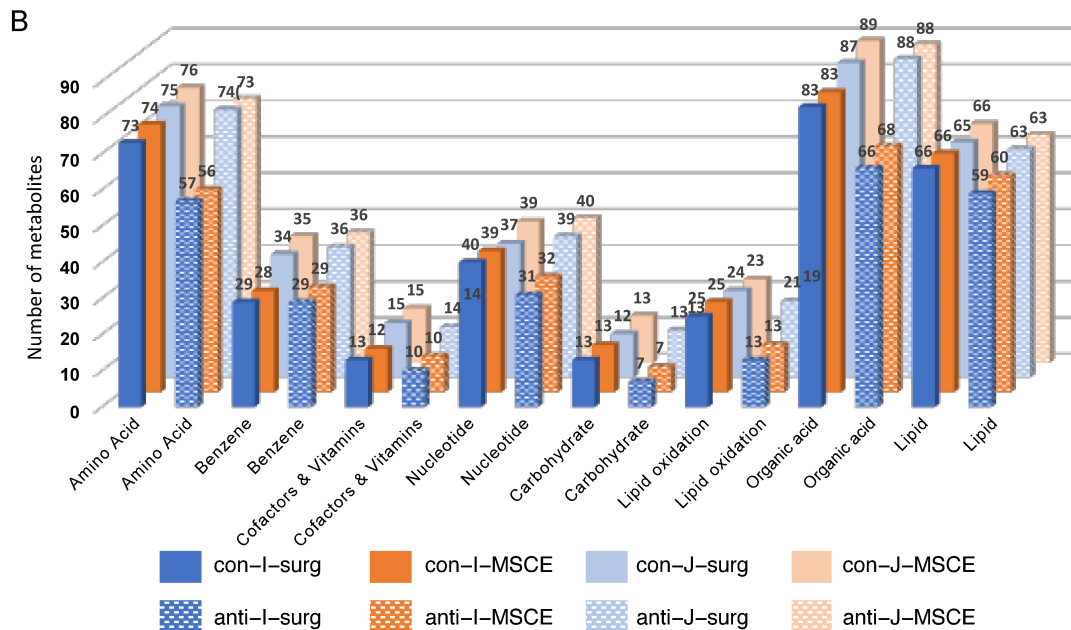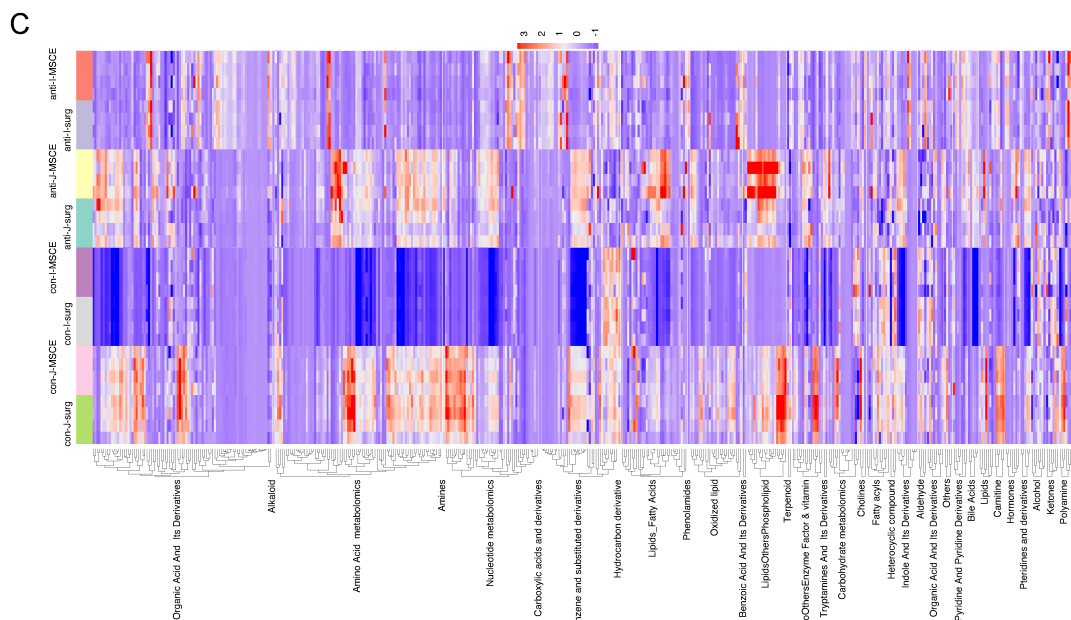

Supplement: inline-supplementary-material-16 [file inline-supplementary-material-16.pdf]
